# Supplementary material for: Preparation and Characterization of Liposomal Everolimus by Thin-Film Hydration Technique
Source: Hindawi journal article supplement (doi:10.1155/2020/5462949), 2020-10-10
Supplement: f1 [file 5462949.f1.pdf]

**ID: 5462949**

**“Preparation and characterization of liposomal everolimus by thin-film hydration technique”**

**Supplementary Materials**

The supplementary section is divided in two appendixes: appendix A, being tables with numerical data obtained for size, PDI, and zeta potential of liposomes, and appendix B, being the statistical analysis numerical evidence of results stated in the manuscript.

**Appendix A**

**Table A.1** Hydrodynamic diameter obtained by DLS for samples A-E where POPC: Chol: DOPC / Lipid: drug (L: F) ratios are observed. The average  $\pm$  standard deviation is shown, where  $n = 3$ .

| Week | Blank (9:1:0 / N.A) | Sample A (9:1:0 / 60:1) | Sample B (9:1:0 / 45:1) | Sample C (9:1:0 / 30:1) | Sample D (3:7:0 / 60:1) | Sample E (0:1:9 / 60:1) |
|------|---------------------|-------------------------|-------------------------|-------------------------|-------------------------|-------------------------|
| 1    | 120.18 $\pm$ 13.2   | 117.31 $\pm$ 9.4        | 118.22 $\pm$ 4          | 123.95 $\pm$ 2.5        | 119.23 $\pm$ 14.1       | 142.07 $\pm$ 23.1       |
| 2    | 117.15 $\pm$ 8.2    | 113.03 $\pm$ 9.3        | 120.27 $\pm$ 3.7        | 121.3 $\pm$ 1.2         | 118 $\pm$ 13.4          | 141.14 $\pm$ 23.8       |
| 3    | 114.23              | 112.8 $\pm$ 9.9         | 118.63 $\pm$ 3.4        | 123.03 $\pm$ 1.2        | 120 $\pm$ 15.1          | 140.9 $\pm$ 22.9        |
| 4    | 113.5               | 115.56 $\pm$ 10.8       | 118.79 $\pm$ 5.2        | 121.69 $\pm$ 0.9        | 121.86 $\pm$ 14.4       | 138.61 $\pm$ 26.7       |

**Table A.2** Polydispersity index obtained by DLS for samples A-E where POPC: Chol: DOPC / L: F ratios are observed. The average  $\pm$  standard deviation is shown, where  $n = 3$ .

| Week | Blank (9:1:0 / N.A) | Sample A (9:1:0 / 60:1) | Sample B (9:1:0 / 45:1) | Sample C (9:1:0 / 30:1) | Sample D (3:7:0 / 60:1) | Sample E (0:1:9 / 60:1) |
|------|---------------------|-------------------------|-------------------------|-------------------------|-------------------------|-------------------------|
| 1    | 0.078 $\pm$ 0.21    | 0.124 $\pm$ 0.05        | 0.111 $\pm$ 0.026       | 0.114 $\pm$ 0.041       | 0.129 $\pm$ 0.052       | 0.143 $\pm$ 0.045       |
| 2    | 0.072 $\pm$ 0.006   | 0.086 $\pm$ 0.036       | 0.108 $\pm$ 0.02        | 0.078 $\pm$ 0.009       | 0.132 $\pm$ 0.036       | 0.134 $\pm$ 0.031       |
| 3    | 0.077               | 0.082 $\pm$ 0.047       | 0.08 $\pm$ 0.011        | 0.082 $\pm$ 0.006       | 0.109 $\pm$ 0.009       | 0.139 $\pm$ 0.036       |
| 4    | 0.054               | 0.127 $\pm$ 0.038       | 0.097 $\pm$ 0.042       | 0.08 $\pm$ 0.024        | 0.131 $\pm$ 0.045       | 0.118 $\pm$ 0.01        |

**Table A.3** Zeta potential obtained for samples A-E where POPC: Chol: DOPC / L: F ratios are observed. The average  $\pm$  standard deviation is shown, where  $n = 3$ .

| Week | Blank (9:1:0 / N.A) | Sample A (9:1:0 / 60:1) | Sample B (9:1:0 / 45:1) | Sample C (9:1:0 / 30:1) | Sample D (3:7:0 / 60:1) | Sample E (0:1:9 / 60:1) |
|------|---------------------|-------------------------|-------------------------|-------------------------|-------------------------|-------------------------|
| 1    | -14.43 $\pm$ 6.6    | -11.05 $\pm$ 1.1        | -9.65 $\pm$ 1.4         | -9.68 $\pm$ 2.2         | -13.24 $\pm$ 0.8        | -11.87 $\pm$ 1.5        |
| 2    | -13.03 $\pm$ 4.4    | -8.97 $\pm$ 2.1         | -11.74 $\pm$ 2.4        | -12.30 $\pm$ 2.1        | -11.7 $\pm$ 2.5         | -11.12 $\pm$ 2.9        |
| 3    | -10.993             | -9.30 $\pm$ 1.1         | -8.11 $\pm$ 1.4         | -12.98 $\pm$ 0.5        | -15.6 $\pm$ 5.0         | -10.80 $\pm$ 2.3        |

|   |        |            |           |            |            |            |
|---|--------|------------|-----------|------------|------------|------------|
| 4 | -7.483 | -11.53±1.1 | -8.94±0.3 | -10.53±1.9 | -11.01±1.2 | -10.32±0.5 |
|---|--------|------------|-----------|------------|------------|------------|

## Appendix B

**Table B.1** P-Values obtained by Tukey test for comparison between samples, where "ns" is not significant and the asterisks denote how significant the difference is.

| Tukey test comparison         | Size         |         | PDI          |         | Zeta Potential |         |
|-------------------------------|--------------|---------|--------------|---------|----------------|---------|
|                               | Significance | P-Value | Significance | P-Value | Significance   | P-Value |
| 9:1:0 / N.A vs. 9:1:0 / 60:1  | ns           | 0.999   | ns           | 0.1861  | ns             | >0.9999 |
| 9:1:0 / N.A vs. 9:1:0 / 30:1  | ns           | 0.9604  | ns           | 0.3436  | ns             | 0.9852  |
| 9:1:0 / N.A vs. 9:1:0 / 45:1  | ns           | 0.9997  | ns           | 0.7173  | ns             | 0.9572  |
| 9:1:0 / N.A vs. 7:3:0 / 60:1  | ns           | 0.9984  | **           | 0.0021  | ns             | 0.7061  |
| 9:1:0 / N.A vs. 0:1:9 / 60:1  | **           | 0.009   | **           | 0.0022  | ns             | 0.9278  |
| 9:1:0 / 60:1 vs. 9:1:0 / 30:1 | ns           | 0.686   | ns           | 0.998   | ns             | 0.988   |
| 9:1:0 / 60:1 vs. 9:1:0 / 45:1 | ns           | 0.9647  | ns           | 0.8443  | ns             | 0.8284  |
| 9:1:0 / 60:1 vs. 7:3:0 / 60:1 | ns           | 0.929   | ns           | 0.2868  | ns             | 0.3952  |
| 9:1:0 / 60:1 vs. 0:1:9 / 60:1 | ***          | 0.0002  | ns           | 0.2907  | ns             | 0.7533  |
| 9:1:0 / 30:1 vs. 9:1:0 / 45:1 | ns           | 0.9853  | ns           | 0.9743  | ns             | 0.449   |
| 9:1:0 / 30:1 vs. 7:3:0 / 60:1 | ns           | 0.9955  | ns           | 0.1269  | ns             | 0.1273  |
| 9:1:0 / 30:1 vs. 0:1:9 / 60:1 | *            | 0.0157  | ns           | 0.129   | ns             | 0.3664  |
| 9:1:0 / 45:1 vs. 7:3:0 / 60:1 | ns           | >0.9999 | *            | 0.0211  | ns             | 0.9781  |
| 9:1:0 / 45:1 vs. 0:1:9 / 60:1 | **           | 0.0024  | *            | 0.0216  | ns             | >0.9999 |
| 7:3:0 / 60:1 vs. 0:1:9 / 60:1 | **           | 0.0037  | ns           | >0.9999 | ns             | 0.9918  |

**Table B.2** P-values obtained by Tukey test for the comparison of each sample in time, where “ns” is not significant and the asterisks denote how significant the difference is.

| Tukey test comparison | Significance | P-Value of size | P-Value of PDI | P-Value of zeta potential |
|-----------------------|--------------|-----------------|----------------|---------------------------|
| <b>9:1:0 / N.A</b>    |              |                 |                |                           |
| WEEK 1 vs. WEEK 2     | ns           | 0.9993          | 0.998          | 0.8899                    |
| WEEK 1 vs. WEEK 3     | ns           | 0.9931          | 0.9662         | 0.969                     |
| WEEK 1 vs. WEEK 4     | ns           | 0.9881          | 0.9553         | 0.3105                    |
| WEEK 2 vs. WEEK 3     | ns           | 0.9844          | 0.9863         | >0.9999                   |
| WEEK 2 vs. WEEK 4     | ns           | 0.9952          | 0.9798         | 0.6028                    |
| WEEK 3 vs. WEEK 4     | ns           | 0.9622          | >0.9999        | 0.7147                    |
| <b>9:1:0 / 60:1</b>   |              |                 |                |                           |
| WEEK 1 vs. WEEK 2     | ns           | 0.5248          | 0.9778         | 0.6973                    |
| WEEK 1 vs. WEEK 3     | ns           | 0.4301          | 0.9742         | 0.7944                    |
| WEEK 1 vs. WEEK 4     | ns           | 0.9995          | 0.9984         | 0.9946                    |
| WEEK 2 vs. WEEK 3     | ns           | 0.9986          | >0.9999        | 0.9982                    |
| WEEK 2 vs. WEEK 4     | ns           | 0.4562          | 0.9952         | 0.5442                    |
| WEEK 3 vs. WEEK 4     | ns           | 0.3669          | 0.9938         | 0.6502                    |
| <b>9:1:0 / 45:1</b>   |              |                 |                |                           |
| WEEK 1 vs. WEEK 2     | ns           | 0.9995          | 0.9975         | 0.6948                    |
| WEEK 1 vs. WEEK 3     | ns           | 0.6779          | >0.9999        | 0.8511                    |
| WEEK 1 vs. WEEK 4     | ns           | 0.9562          | >0.9999        | 0.9818                    |
| WEEK 2 vs. WEEK 3     | ns           | 0.7451          | 0.9987         | 0.2426                    |
| WEEK 2 vs. WEEK 4     | ns           | 0.9785          | 0.999          | 0.4645                    |
| WEEK 3 vs. WEEK 4     | ns           | 0.9278          | >0.9999        | 0.9727                    |
| <b>9:1:0 / 30:1</b>   |              |                 |                |                           |

|                     |    |         |         |        |
|---------------------|----|---------|---------|--------|
| WEEK 1 vs. WEEK 2   | ns | 0.5599  | 0.9945  | 0.5252 |
| WEEK 1 vs. WEEK 3   | ns | 0.663   | 0.9998  | 0.3219 |
| WEEK 1 vs. WEEK 4   | ns | 0.6154  | 0.9965  | 0.9698 |
| WEEK 2 vs. WEEK 3   | ns | 0.9983  | 0.9984  | 0.984  |
| WEEK 2 vs. WEEK 4   | ns | 0.9997  | >0.9999 | 0.7935 |
| WEEK 3 vs. WEEK 4   | ns | 0.9998  | 0.9993  | 0.58   |
| <b>7:3:0 / 60:1</b> |    |         |         |        |
| WEEK 1 vs. WEEK 2   | ns | 0.9996  | 0.9994  | 0.8535 |
| WEEK 1 vs. WEEK 3   | ns | 0.9501  | 0.9999  | 0.9568 |
| WEEK 1 vs. WEEK 4   | ns | 0.9998  | 0.9947  | 0.6491 |
| WEEK 2 vs. WEEK 3   | ns | 0.9731  | 0.9976  | 0.9911 |
| WEEK 2 vs. WEEK 4   | ns | >0.9999 | 0.9836  | 0.9827 |
| WEEK 3 vs. WEEK 4   | ns | 0.9677  | 0.9981  | 0.9109 |
| <b>0:1:9 / 60:1</b> |    |         |         |        |
| WEEK 1 vs. WEEK 2   | ns | 0.9724  | >0.9999 | 0.9702 |
| WEEK 1 vs. WEEK 3   | ns | >0.9999 | 0.9995  | 0.9431 |
| WEEK 1 vs. WEEK 4   | ns | 0.8093  | 0.9879  | 0.9149 |
| WEEK 2 vs. WEEK 3   | ns | 0.959   | >0.9999 | 0.7468 |
| WEEK 2 vs. WEEK 4   | ns | 0.9677  | 0.9935  | 0.6942 |
| WEEK 3 vs. WEEK 4   | ns | 0.7747  | 0.9964  | 0.9997 |
